# Supplementary material
Source: PubMed Central journal article supplement (PMC3549637)
Supplement: Supp_Data.pdf [file Supp_Data.pdf]

## Supplementary Data

### Supplementary References

1. Nagy A, J Rossant, R Nagy, W Abramow-Newerly and JC Roder. (1993). Derivation of completely cell culture-derived mice from early-passage embryonic stem cells. Proc Natl Acad Sci U S A 90:8424–8428.
2. Vintersten K, C Monetti, M Gertsenstein, P Zhang, L Laszlo, S Biechele, A Nagy. (2004). Mouse in red: red fluorescent pro-
- tein expression in mouse ES cells, embryos, and adult animals. Genesis 40:241–246.
3. Woltjen K, IP Michael, P Mohseni, R Desai, M Mlleikovsky, R Hamalainen, R Cowling, W Wang, P Liu, et al. (2009). *piggyBac* transposition reprograms fibroblasts to induced pluripotent stem cells. Nature 458:766–770.

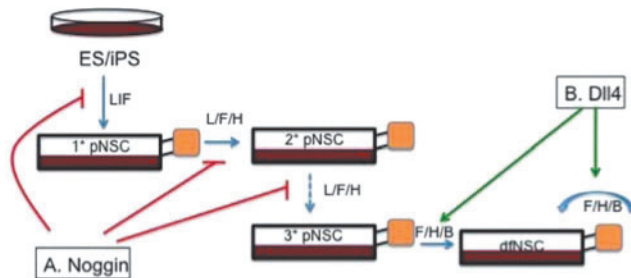

**SUPPLEMENTARY FIG. S1.** Schematic diagram of cell culture conditions. The default pathway of neuralization relies on the absence of cues that direct pluripotent cells to other lineages resulting in the acquisition of a neural identity. In brief, following ES/iPS cell expansion conditions, the cells were cultured in serum-free media (SFM) with LIF at low cellular density (10 cell/ $\mu$ L) to yield primary primitive neural stem cells (pNSCs). These pNSCs were further passaged in SFM with LIF(L), FGF2(F), and heparin(H) to generate sphere colonies of secondary, tertiary, etc. pNSCs. To generate definitive NSCs (dNSCs) the pNSCs were passaged in SFM lacking LIF and containing FGF2, heparin, and B27(B) supplement. (A) Noggin is a BMP antagonist that was used to reinforce the default pathway during the neuralization of the iPSCs. Noggin (200 ng/mL; R&D systems) was added to the culture condition during the induction and maintenance of the pNSCs. (B) NOTCH signaling has been shown to be essential for the maintenance of dNSCs, as well as to inhibit the further differentiation of these cells. Delta-like ligand 4 (DLL4, 500 ng/mL; R&D systems) was added to the definitive culture conditions to induce the NOTCH pathway. ES, embryonic stem; iPS, induced pluripotent stem; LIF, leukemia inhibitory factor; FGF, fibroblast growth factor; BMP, bone morphogenetic proteins.

## Hes1

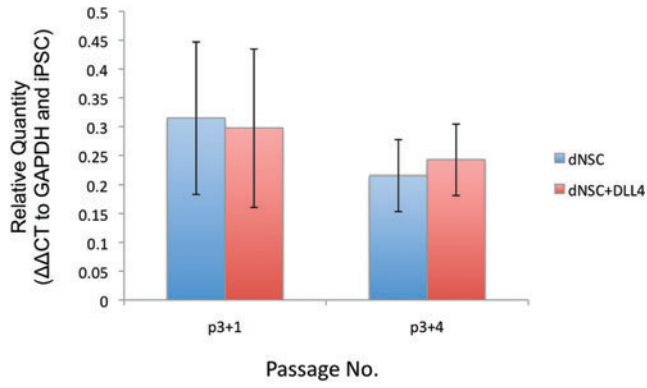

**SUPPLEMENTARY FIG. S2.** *Hes1* mRNA levels in iPS-dNSCs are not affected by addition of DLL4 to culture conditions. RT-PCR for HES1, a NOTCH pathway-related effector, showed no significant difference in *Hes1* expression during the initial passage (p3+1) or the fourth definitive passage (p3+4) of iPS-dNSCs regardless of NOTCH agonism (C5-4A iPSC line). RT-PCR, real-time-polymerase chain reaction.

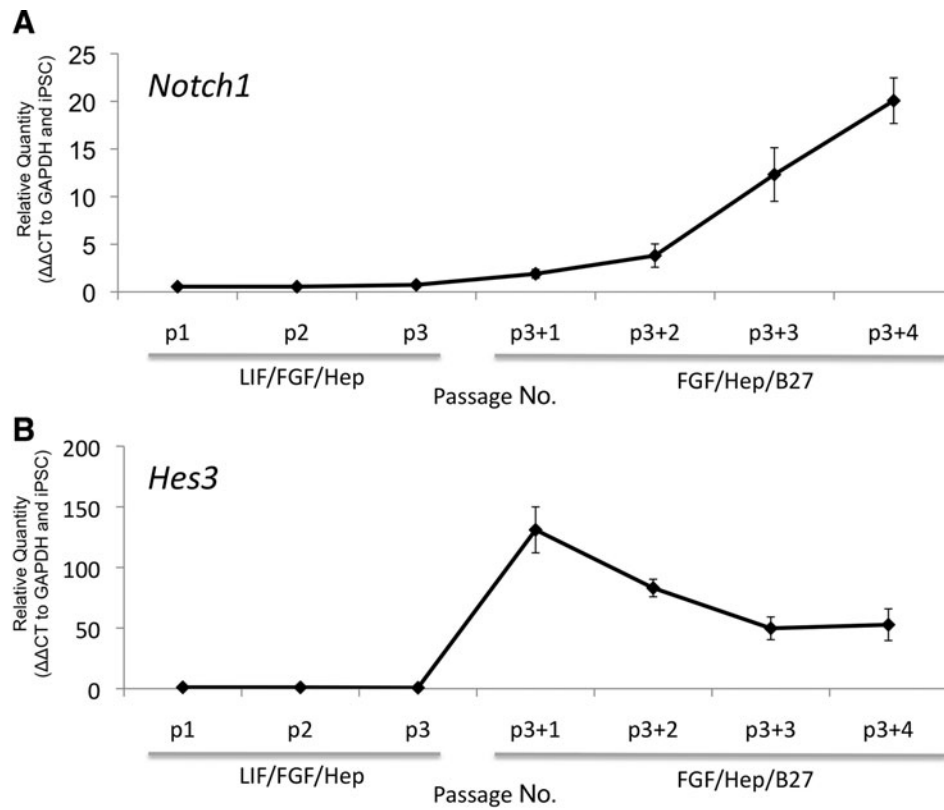

**SUPPLEMENTARY FIG. S3.** *Notch1* and *Hes3* gene expression in ES-NSCs during both the primitive and definitive stage of neuralization following the default pathway conditions. RT-PCR for the NOTCH pathway genes *Notch1* and *Hes3* showed that these genes are maintained in the definitive state of ES-derived NSCs (R1 ES cell line).

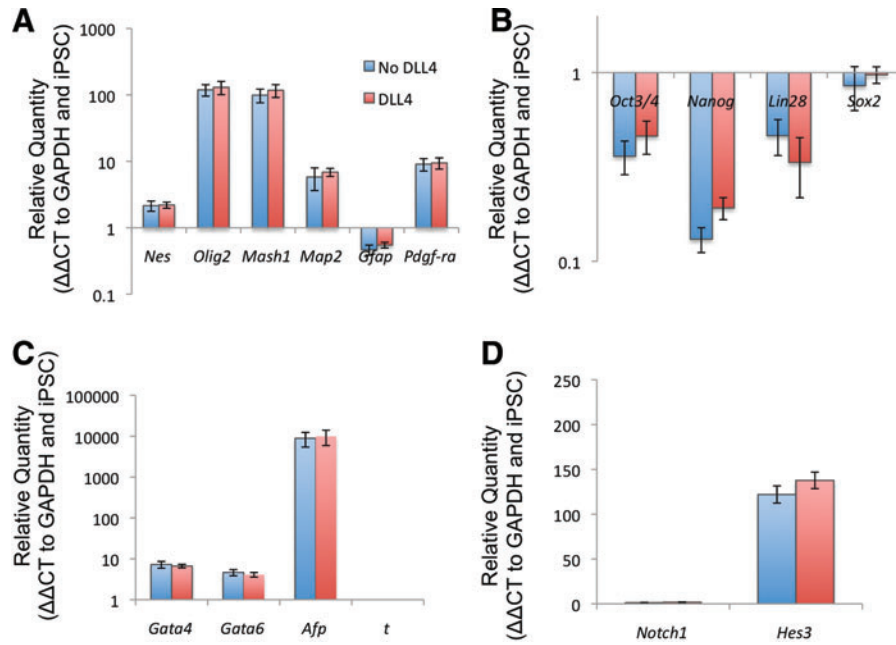

**SUPPLEMENTARY FIG. S4.** The initial passage of iPS-dNSCs in definitive media resulted in an mRNA profile that was intermediate between primitive and definitive characteristics. Following a single passage in SFM+ FGF2, heparin, and B27, the resultant dNSCs showed an mRNA profile indicative of poor neuralization in terms of neural markers (A), pluripotency markers (B), nonectodermal markers (C), and NOTCH pathway genes (D). The addition of DLL4 did not affect the initial definitive passage (C5-4A iPSC line).

SUPPLEMENTARY TABLE S1. CELL LINES

| <i>Cell line</i> | <i>Description</i>                                                                                                                                                           | <i>References</i> |
|------------------|------------------------------------------------------------------------------------------------------------------------------------------------------------------------------|-------------------|
| ESCs             |                                                                                                                                                                              |                   |
| R1               | Derived from male blastocyst, hybrid of two 129 substrains (129×1/SvJ and 129S1/SV-+p+<br><i>Tyr-cKitlSl-J/+</i> )                                                           | [1]               |
| G4               | Male blastocyst derived from the natural mating of 129S6/SvEvTac female with C57BL/6Ncr male                                                                                 | [2]               |
| iPSCs            |                                                                                                                                                                              |                   |
| C5               | MEFs were isolated from 15.5d.p.c. ROSA26 knockin rtTA-IRES-GFP17 embryos. Single copy of transgene MKOS cassette.                                                           | [3]               |
| C5-4A            | MEFs were isolated from 15.5d.p.c. ROSA26 knockin rtTA-IRES-GFP17 embryos. Single copy of transgene MKOS cassette removed following reprogramming, daughter cell line to C5. | [3]               |
| B1-1G            | MEFs were isolated from 15.5d.p.c. ROSA26 knockin rtTA-IRES-GFP17 embryos. Single copy of transgene MKOS cassette removed following reprogramming.                           | [3]               |

ESCs, embryonic stem cells; MEF, mouse embryonic fibroblast; iPSCs, induced pluripotent stem cells.

SUPPLEMENTARY TABLE S2. TAQMAN  
GENE EXPRESSION PRIMERS

| <i>Gene</i>            | <i>TAQ expression assay ID</i> |
|------------------------|--------------------------------|
| <i>Acl1 (Mash1)</i>    | Mm03058063_m1                  |
| <i>Afp</i>             | Mm00431715_m1                  |
| <i>Gata4</i>           | Mm00484689_m1                  |
| <i>Gata6</i>           | Mm00802636_m1                  |
| <i>Gfap</i>            | Mm01253033_m1                  |
| <i>Gapdh</i>           | 4352932E                       |
| <i>Hes1</i>            | Mm01342805_m1                  |
| <i>Hes3</i>            | Mm00468603_m1                  |
| <i>Nanog</i>           | Mm02019550_s1                  |
| <i>Nestin</i>          | Mm00450205_m1                  |
| <i>Notch1</i>          | Mm00435249_m1                  |
| <i>Olig2</i>           | Mm01210556_m1                  |
| <i>PDGFra</i>          | Mm00440701_m1                  |
| <i>Sox2</i>            | Mm03053810_s1                  |
| <i>Pouft1 (Oct4)</i>   | Mm03053917_g1                  |
| <i>Lin28</i>           | Mm00524077_m1                  |
| <i>CNPase</i>          | Mm01306640_m1                  |
| <i>Map2</i>            | Mm00521988_m1                  |
| <i>Tuj1 (bIII tub)</i> | Mm00727586_s1                  |

SUPPLEMENTARY TABLE S3. LIST OF PRIMARY ANTIBODIES USED FOR IMMUNOCYTOCHEMISTRY

| <i>Antibody</i>     | <i>Target</i>                                                                  | <i>Concentration</i> | <i>Supplier</i> |
|---------------------|--------------------------------------------------------------------------------|----------------------|-----------------|
| Nestin              | Neural stem cells (NSCs)                                                       | 1:200                | Chemicon        |
| Olig2               | Undifferentiated NSCs, All oligodendrocyte lineages, including oligoprecursors | 1:1,000              | Chemicon        |
| GFAP                | Astrocytes                                                                     | 1:100                | Chemicon        |
| PDGFra              | Immature oligodendrocytes                                                      | 1:50                 | Santa Cruz      |
| CNPase              | Mature oligodendrocytes                                                        | 1:100                | Chemicon        |
| $\beta$ III Tubulin | Neurons                                                                        | 1:500                | Millipore       |
| Oct4 (Pou5f)        | Pluripotent stem cells                                                         | 1:500                | Sigma           |
| Afp                 | Pan-endodermal cell marker                                                     | 1:100                | NovusBio        |
| Notch1              | NOTCH pathway receptor                                                         | 1:100                | Abcam           |
| GFP                 | Green fluorescing Protein                                                      | 1:1,000              | Aves Lab        |
